# Supplementary material
Source: Springer Nature journal article supplement (https://www.springermedizin.de/resource/supplementary/13075_2010_9696_MOESM7_ESM.pdf/9693314)

### A PATELLA SUBCHORT THICKNESS

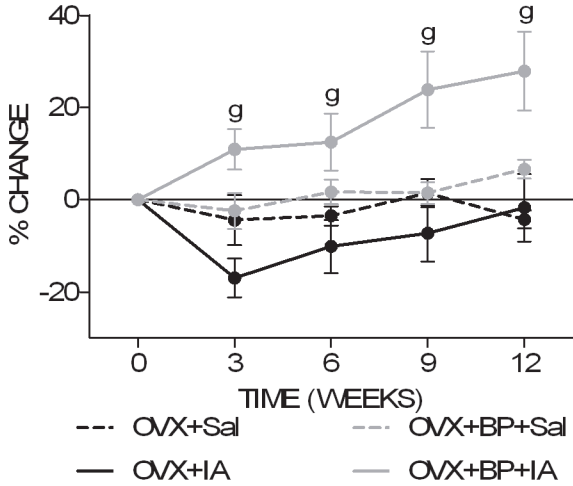

### B LATERAL SUBCH PLATE THICKNESS

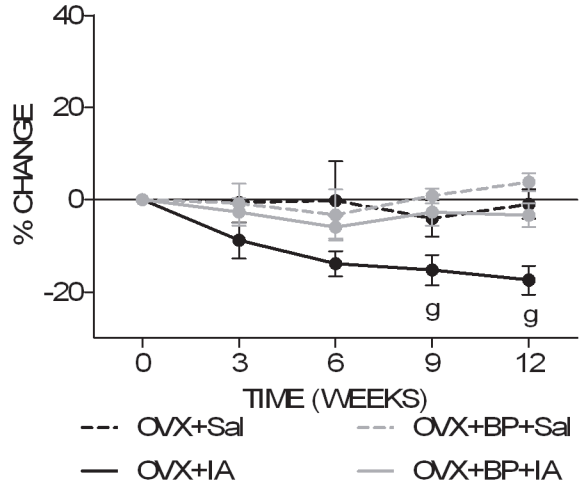

### C PATELLA BV/TV

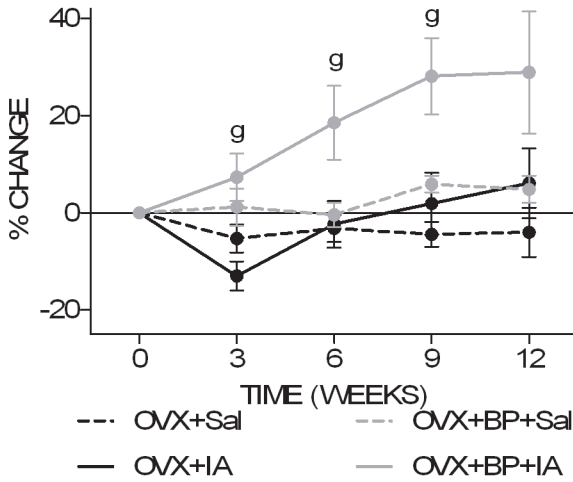

### D EPIPHYSIS BV/TV

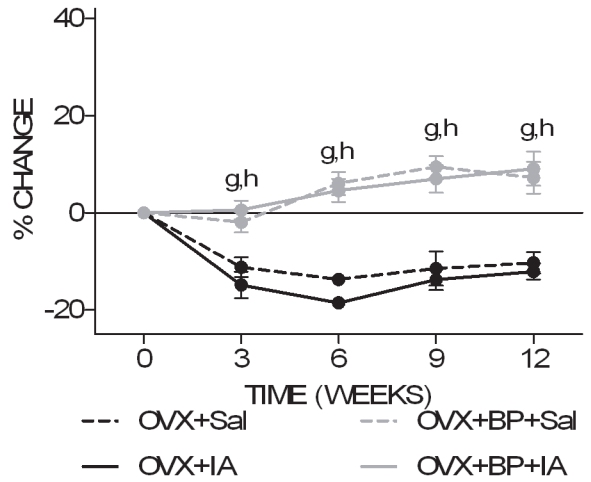

### E PATELLA CARTILAGE DAMAGE (-)

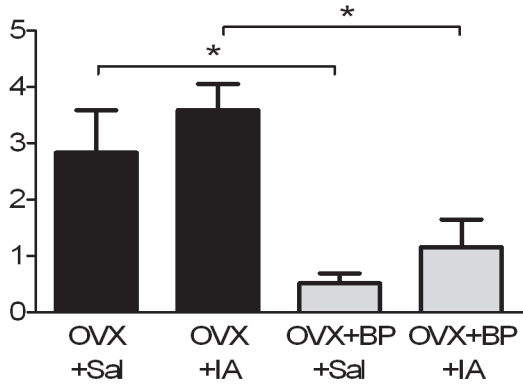

### F MEDIAL TIBIA CARTILAGE DAMAGE (-)

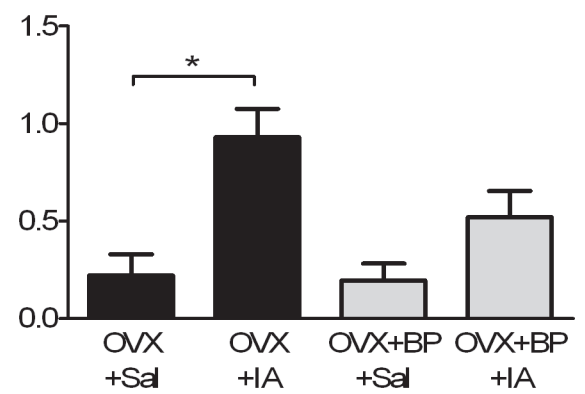

Supplement: MOESM7 [file 9693314]
